# Supplementary material for: Preparation and characterization of fomesafen ionic liquids for reducing the risk to the aquatic environment
Source: Royal Society of Chemistry journal article supplement (doi:10.1039/c4nj01186d), 2014-08-28
Supplement: c4nj01186d1.pdf [file c4nj01186d1.pdf]

**Electronic Supplementary Material (ESI) for New Journal of Chemistry.**  
**This journal is © The Royal Society of Chemistry and the Centre National de la Recherche Scientifique 2014**

## *Electronic supplementary information*

# **Preparation and characterization of fomesafen ionic liquids for reducing the risk to the aquatic environment**

**Guanglong Ding, Yao Liu, Baitao Wang, Darunee Punyapitak, Mingcheng Guo, Yongheng Duan, Jianqiang Li, Yongsong Cao\***

**College of Agriculture and Biotechnology, China Agricultural University, Beijing, China. E-mail: caosong@126.com, caoys@cau.edu.cn; Fax: 86-10-62734302; Tel: 86-10-62734302**

**\*Corresponding author: NO.2 Yuanmingyuan West Road, China Agricultural University, Beijing, China, 100193; Telephone number: 86-10-62734302 (O), 86-10-62734302 (FAX)**

**Email: caosong@126.com, caoys@cau.edu.cn**

## Table of contents

1. **Fig. S1**  $^1\text{H}$  NMR (300.13 MHz;  $\text{CDCl}_3$ ) of **N-1** (Cetyl trimethyl ammonium 5-[2-chloro-4-(trifluoromethyl)phenoxy]-N-[methylsulfonyl]-2-nitrobenzamide )
2. **Fig. S2**  $^1\text{H}$  NMR (300.13 MHz;  $\text{CDCl}_3$ ) of **Ben-1** (Benzyltriethylammonium 5-[2-chloro-4-(trifluoromethyl)phenoxy]-N-[methylsulfonyl]-2-nitrobenzamide)
3. **Fig. S3**  $^1\text{H}$  NMR (300.13 MHz;  $\text{CDCl}_3$ ) of **Pry-1** (1-Hexadecylpyridinium 5-[2-chloro-4-(trifluoromethyl)phenoxy]-N-[methylsulfonyl]-2-nitrobenzamide)
4. **Fig. S4**  $^1\text{H}$  NMR (300.13 MHz;  $\text{CDCl}_3$ ) of **Im-1** (1-Butyl-3-methylimidazolium 5-[2-chloro-4-(trifluoromethyl)phenoxy]-N-[methylsulfonyl]-2-nitrobenzamide)
5. **Fig. S5**  $^{13}\text{C}$  NMR (75.47 MHz;  $\text{CDCl}_3$ ) of **N-1** (Cetyl trimethyl ammonium 5-[2-chloro-4-(trifluoromethyl)phenoxy]-N-[methylsulfonyl]-2-nitrobenzamide )
6. **Fig. S6**  $^{13}\text{C}$  NMR (75.47 MHz;  $\text{CDCl}_3$ ) of **Ben-1** (Benzyltriethylammonium 5-[2-chloro-4-(trifluoromethyl)phenoxy]-N-[methylsulfonyl]-2-nitrobenzamide)
7. **Fig. S7**  $^{13}\text{C}$  NMR (75.47 MHz;  $\text{CDCl}_3$ ) of **Pry-1** (1-Hexadecylpyridinium 5-[2-chloro-4-(trifluoromethyl)phenoxy]-N-[methylsulfonyl]-2-nitrobenzamide)
8. **Fig. S8**  $^{13}\text{C}$  NMR (75.47 MHz;  $\text{CDCl}_3$ ) of **Im-1** (1-Butyl-3-methylimidazolium 5-[2-chloro-4-(trifluoromethyl)phenoxy]-N-[methylsulfonyl]-2-nitrobenzamide)
9. **Fig. S9** The surface tension curves ( $\gamma$ -lg C curves) for **N-1** (A), **Ben-1** (B), **Pyr-1** (C), **Im-1** (D).

<sup>1</sup>H NMR of 1

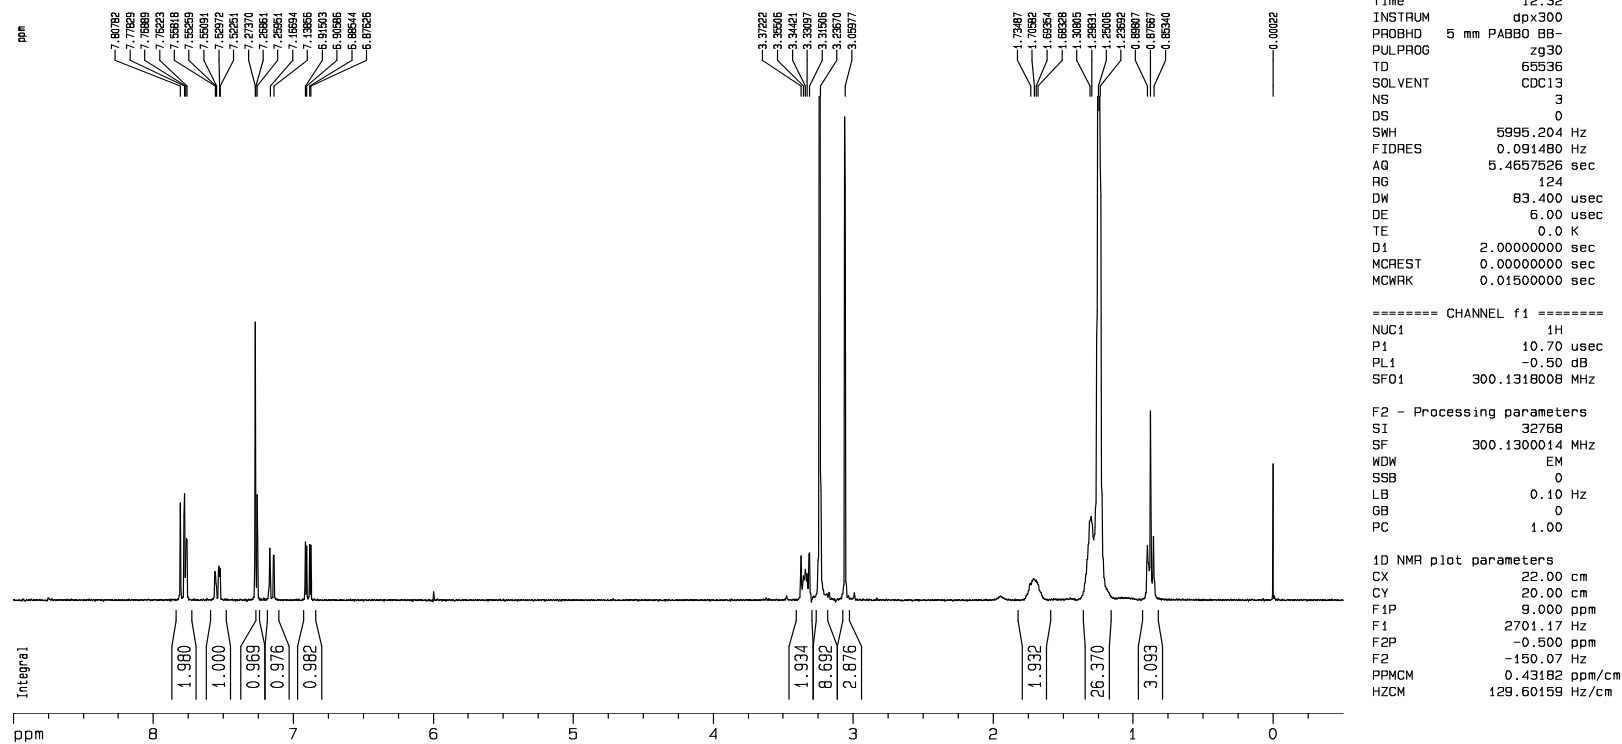

**Fig. S1** <sup>1</sup>H NMR (300.13 MHz; CDCl<sub>3</sub>) of **N-1** (Cetyl trimethyl ammonium 5-[2-chloro-4-(trifluoromethyl)phenoxy]-N-[methylsulfonyl]-2-nitrobenzamide )

1H NMR of 2

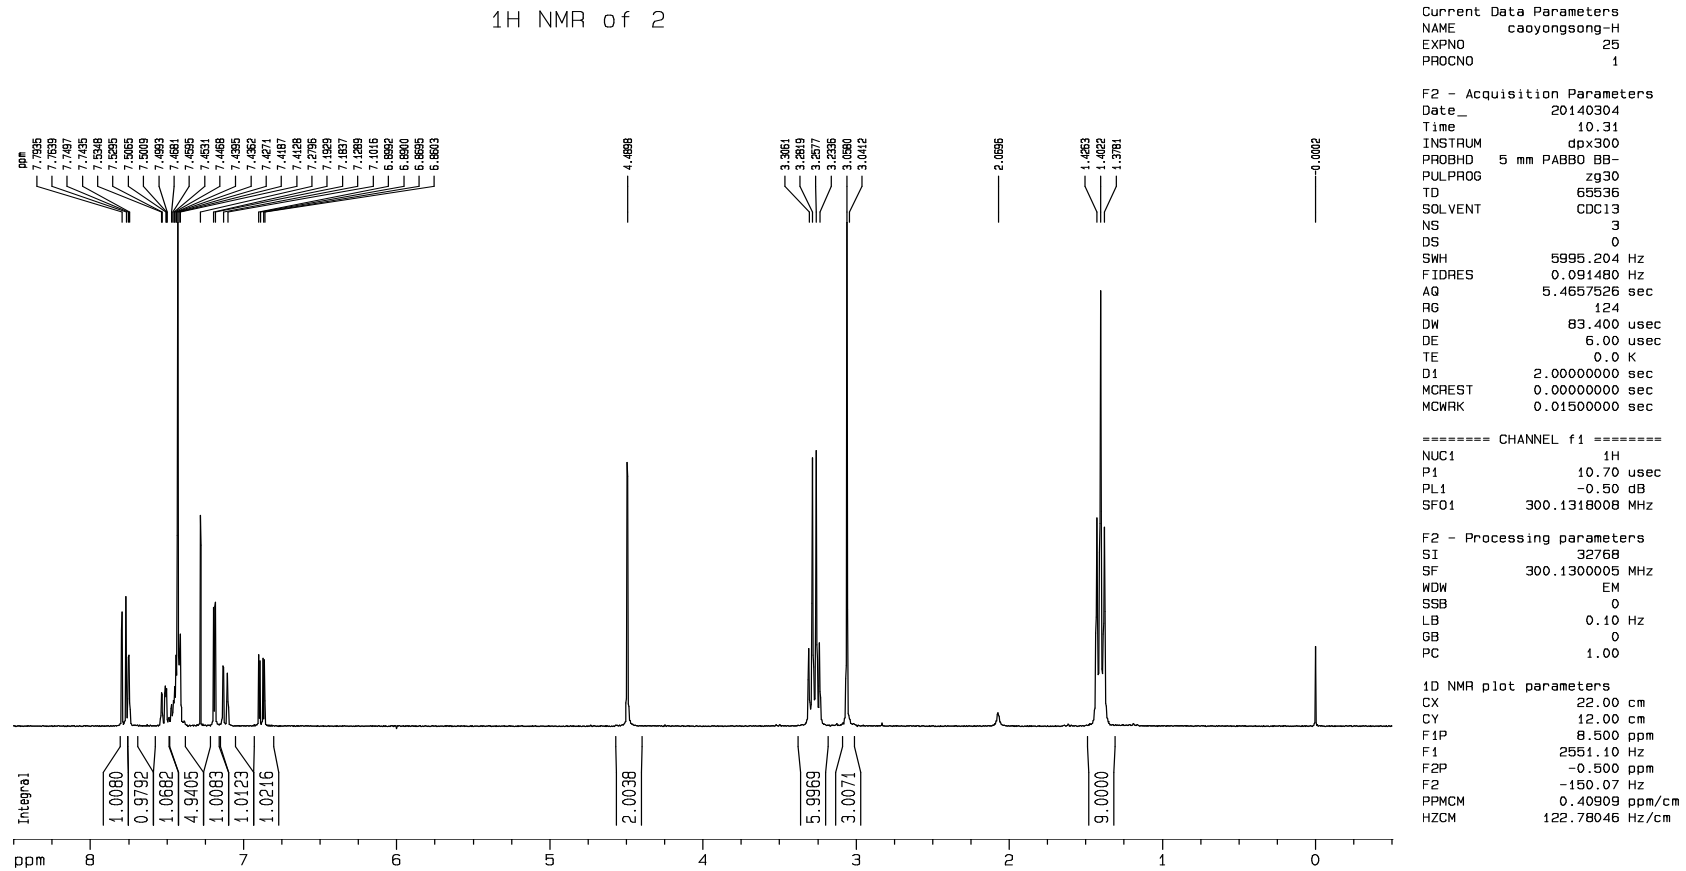

Fig. S2 <sup>1</sup>H NMR (300.13 MHz; CDCl<sub>3</sub>) of **Ben-1** (Benzyltriethylammonium 5-[2-chloro-4-(trifluoromethyl)phenoxy]-N-[methylsulfonyl]-2-nitrobenzamide)

1H NMR of 3

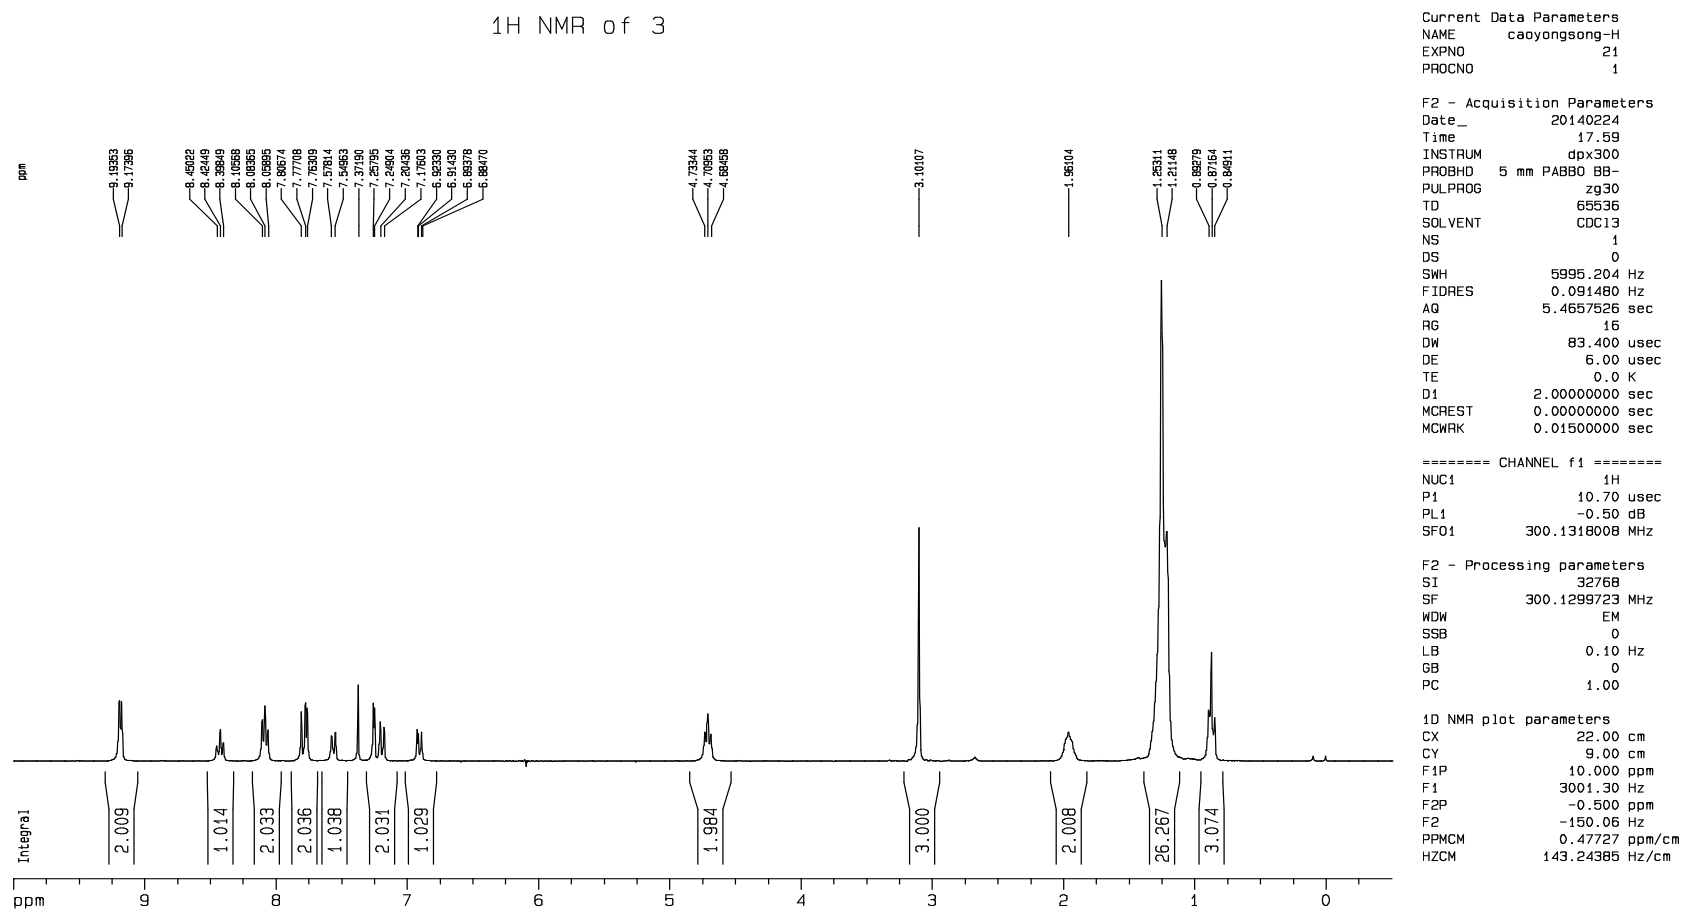

Fig. S3 <sup>1</sup>H NMR (300.13 MHz; CDCl<sub>3</sub>) of **Pry-1** (1-Hexadecylpyridinium 5-[2-chloro-4-(trifluoromethyl)phenoxy]-N-[methylsulfonyl]-2-nitrobenzamide)

<sup>1</sup>H NMR of 4

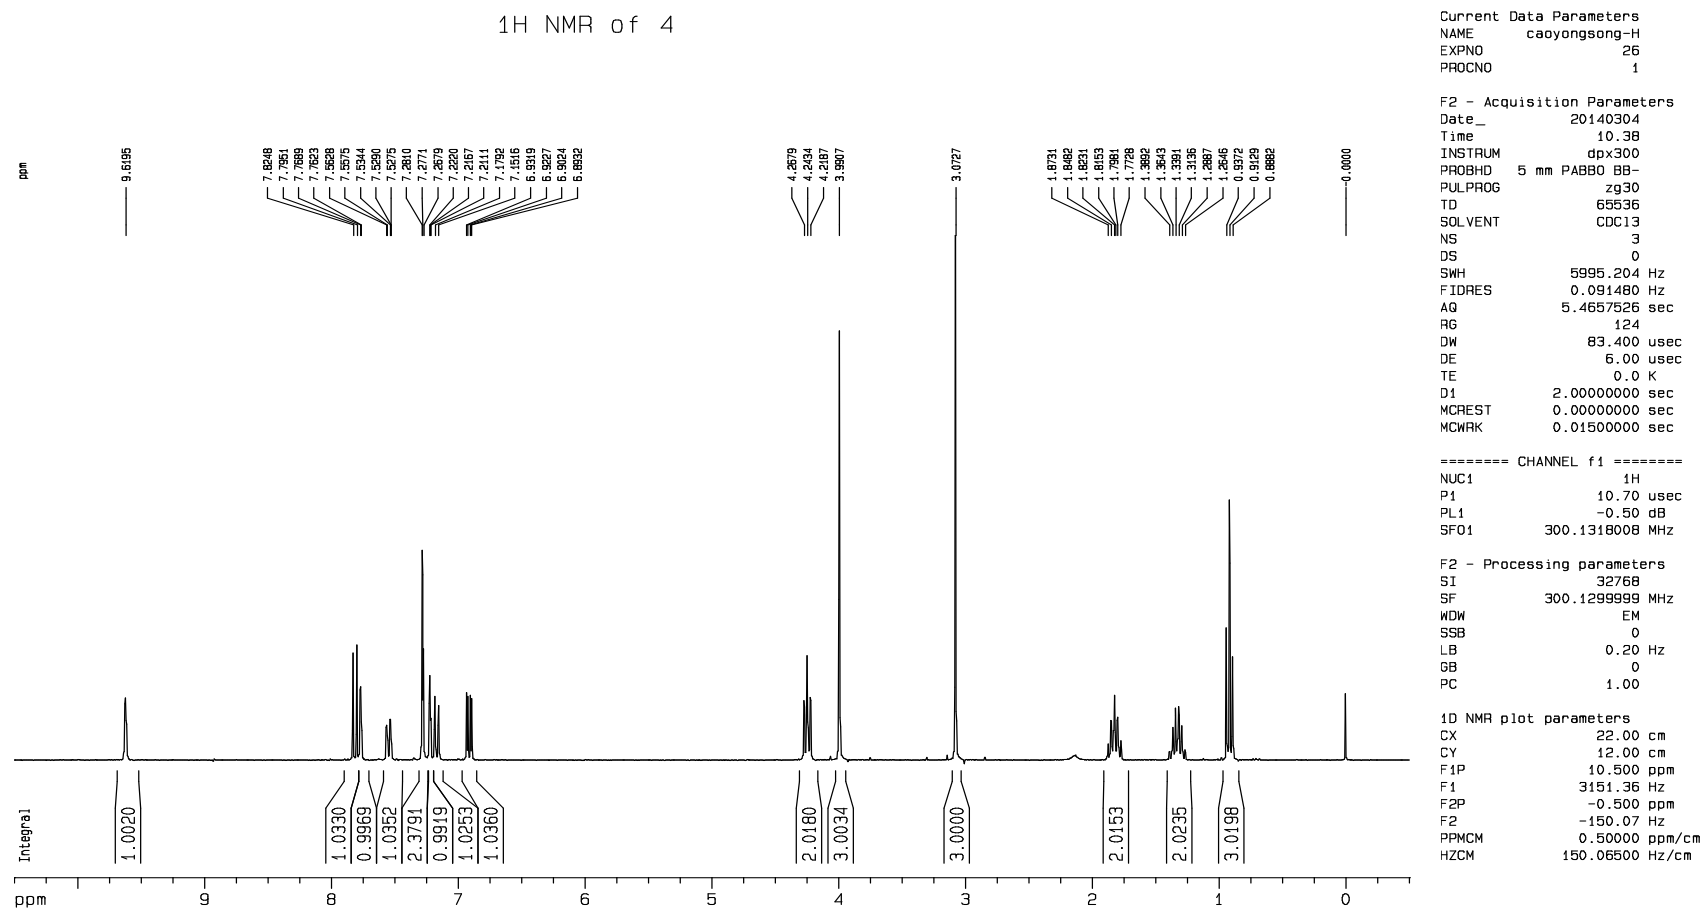

Fig. S4 <sup>1</sup>H NMR (300.13 MHz; CDCl<sub>3</sub>) of **Im-1** (1-Butyl-3-methylimidazolium 5-[2-chloro-4-(trifluoromethyl)phenoxy]-N-[methylsulfonyl]-2-nitrobenzamide)

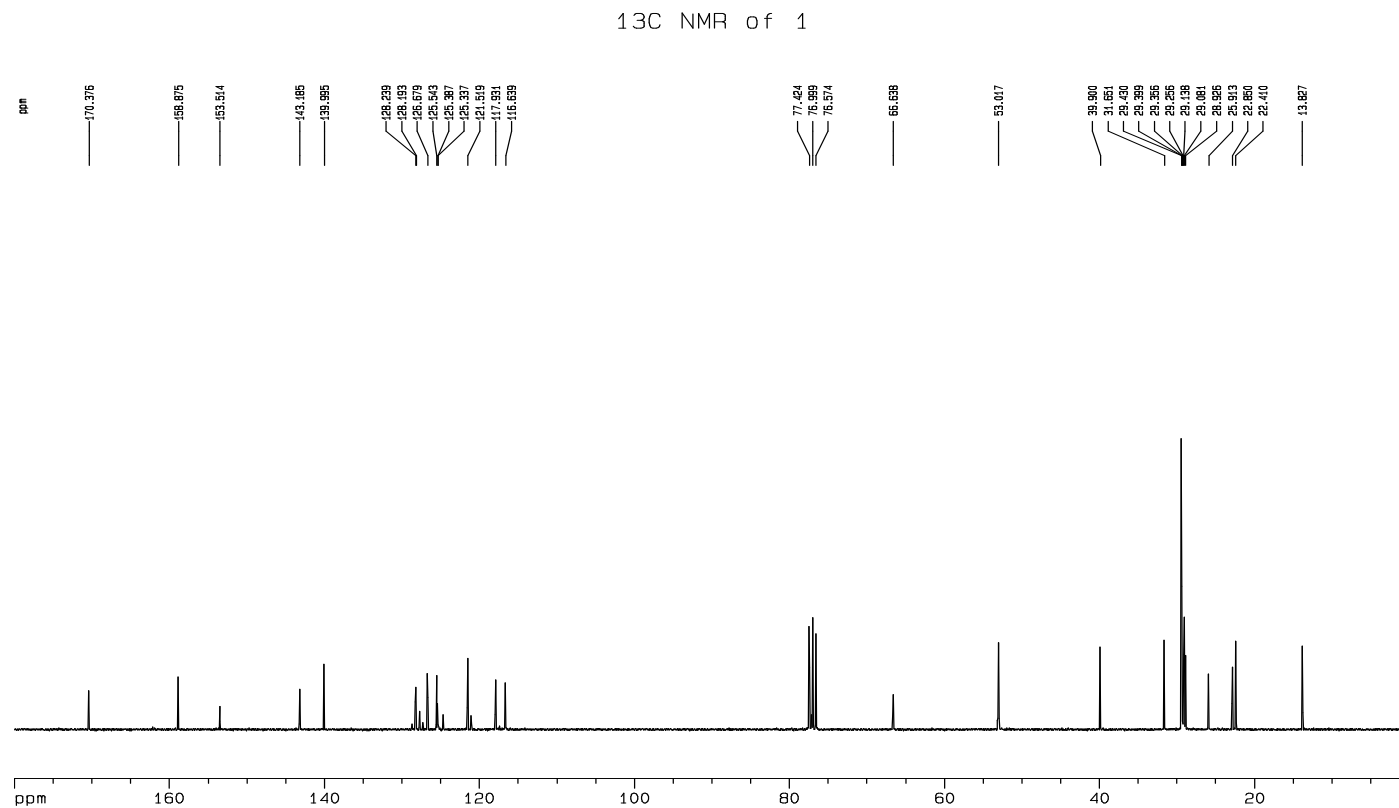

```

Current Data Parameters
NAME      caoyongsong-13C
EXPNO    1
PROCNO   1

F2 - Acquisition Parameters
Date_    20140820
Time     12.58
INSTRUM  dpX300
PROBHD   5 mm PABBO BB-
PULPROG  zgdc30
TD        65536
SOLVENT  CDCl3
NS        945
DS        8
SWH       22675.736 Hz
FIDRES    0.346004 Hz
AQ        1.4451188 sec
RG        8192
DW        22.050 usec
DE        6.00 usec
TE        0.0 K
D1        1.5000000 sec
d11       0.0300000 sec
MCREST    0.0000000 sec
MCWRK     0.0150000 sec

===== CHANNEL f1 =====
NUC1      13C
P1        12.00 usec
PL1       0.00 dB
SF01      75.4752958 MHz

===== CHANNEL f2 =====
CPDPRG2   waltz16
NUC2      1H
PCPD2     80.00 usec
PL2       -0.50 dB
PL12      17.70 dB
SF02      300.1315007 MHz

F2 - Processing parameters
SI         32768
SF         75.4677617 MHz
WDW        EM
SSB        0
LB         0.50 Hz
GB         0
PC         0.50

1D NMR plot parameters
CX         22.00 cm
CY         6.00 cm
F1P        180.000 ppm
F1         13584.20 Hz
F2P        0.000 ppm
F2         0.00 Hz
PPMCM      8.18182 ppm/cm
HZCM       617.46350 Hz/cm

```

Fig. S5 <sup>13</sup>C NMR (75.47 MHz; CDCl<sub>3</sub>) of N-1 (Cetyl trimethyl ammonium 5-[2-chloro-4-(trifluoromethyl)phenoxy]-N-[methylsulfonyl]-2-nitrobenzamide )

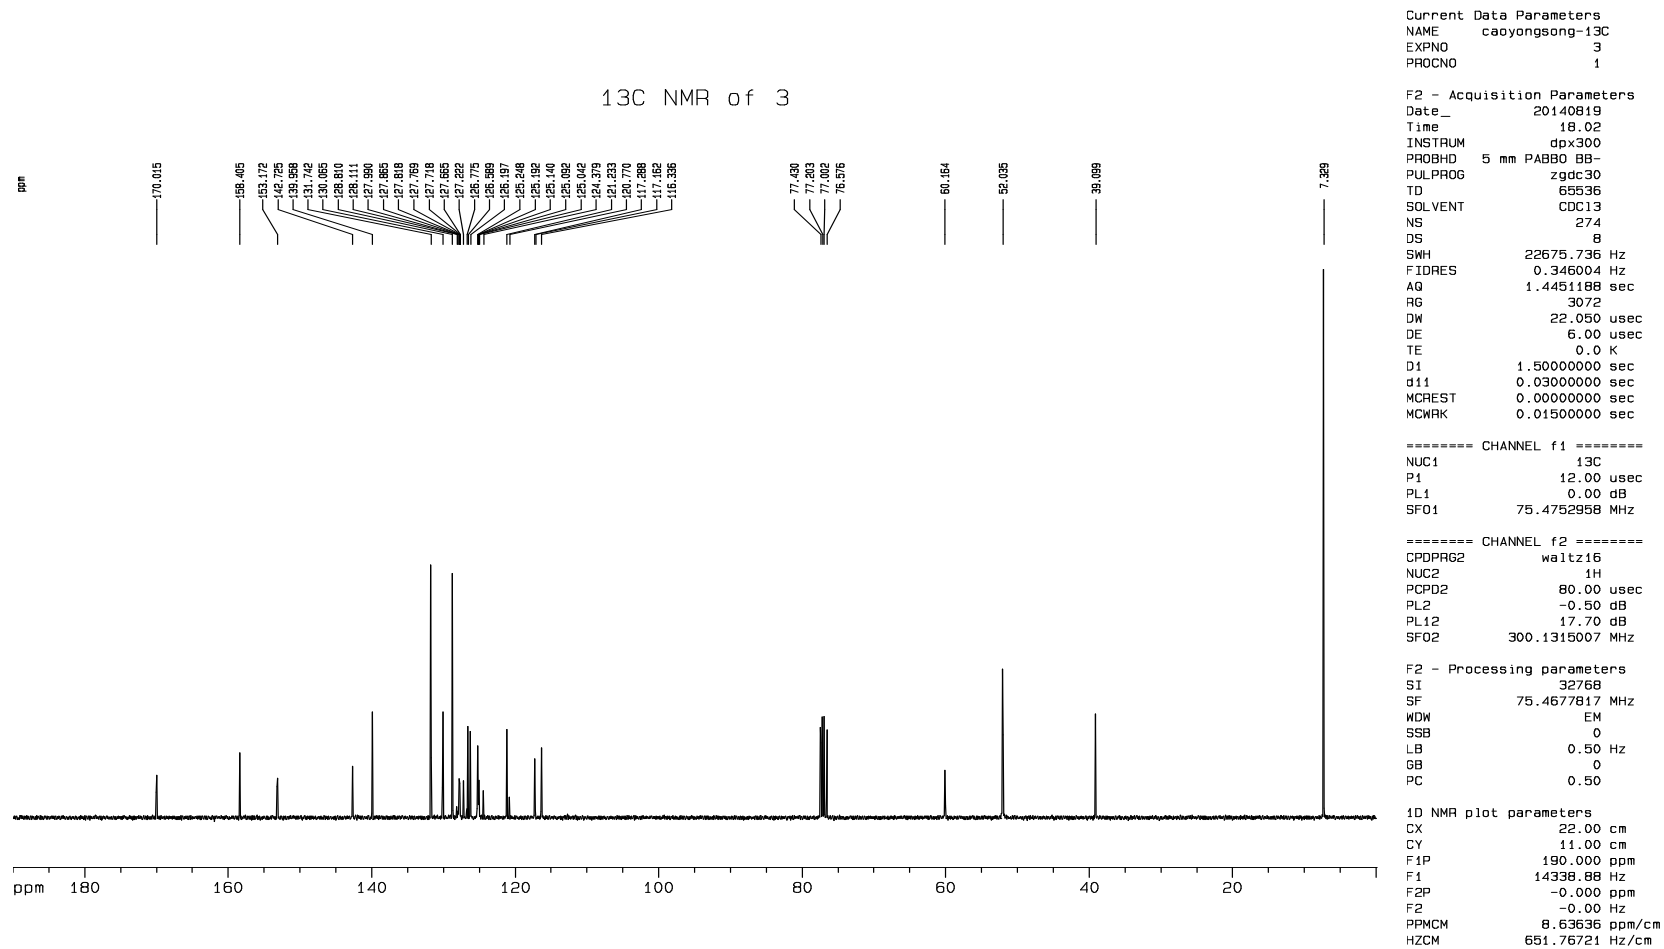

Fig. S6 <sup>13</sup>C NMR (75.47 MHz; CDCl<sub>3</sub>) of **Ben-1** (Benzyltriethylammonium 5-[2-chloro-4-(trifluoromethyl)phenoxy]-N-[methylsulfonyl]-2-nitrobenzamide)



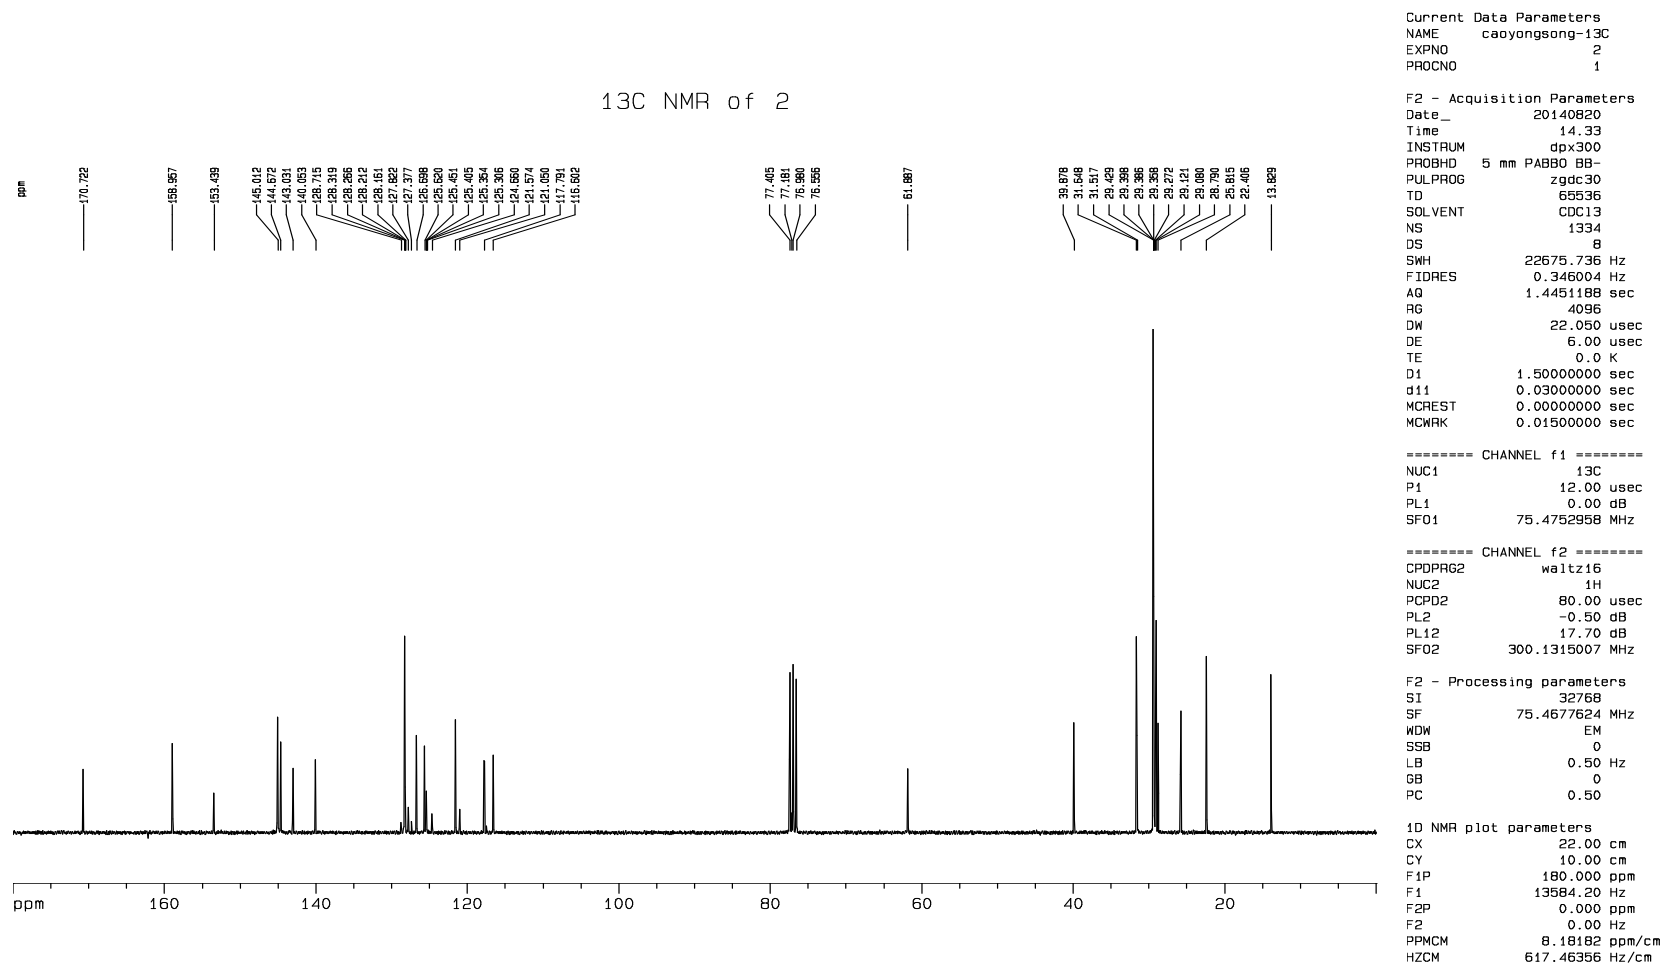

Fig. S7 <sup>13</sup>C NMR (75.47 MHz; CDCl<sub>3</sub>) of **Pry-1** (1-Hexadecylpyridinium 5-[2-chloro-4-(trifluoromethyl)phenoxy]-N-[methylsulfonyl]-2-nitrobenzamide)

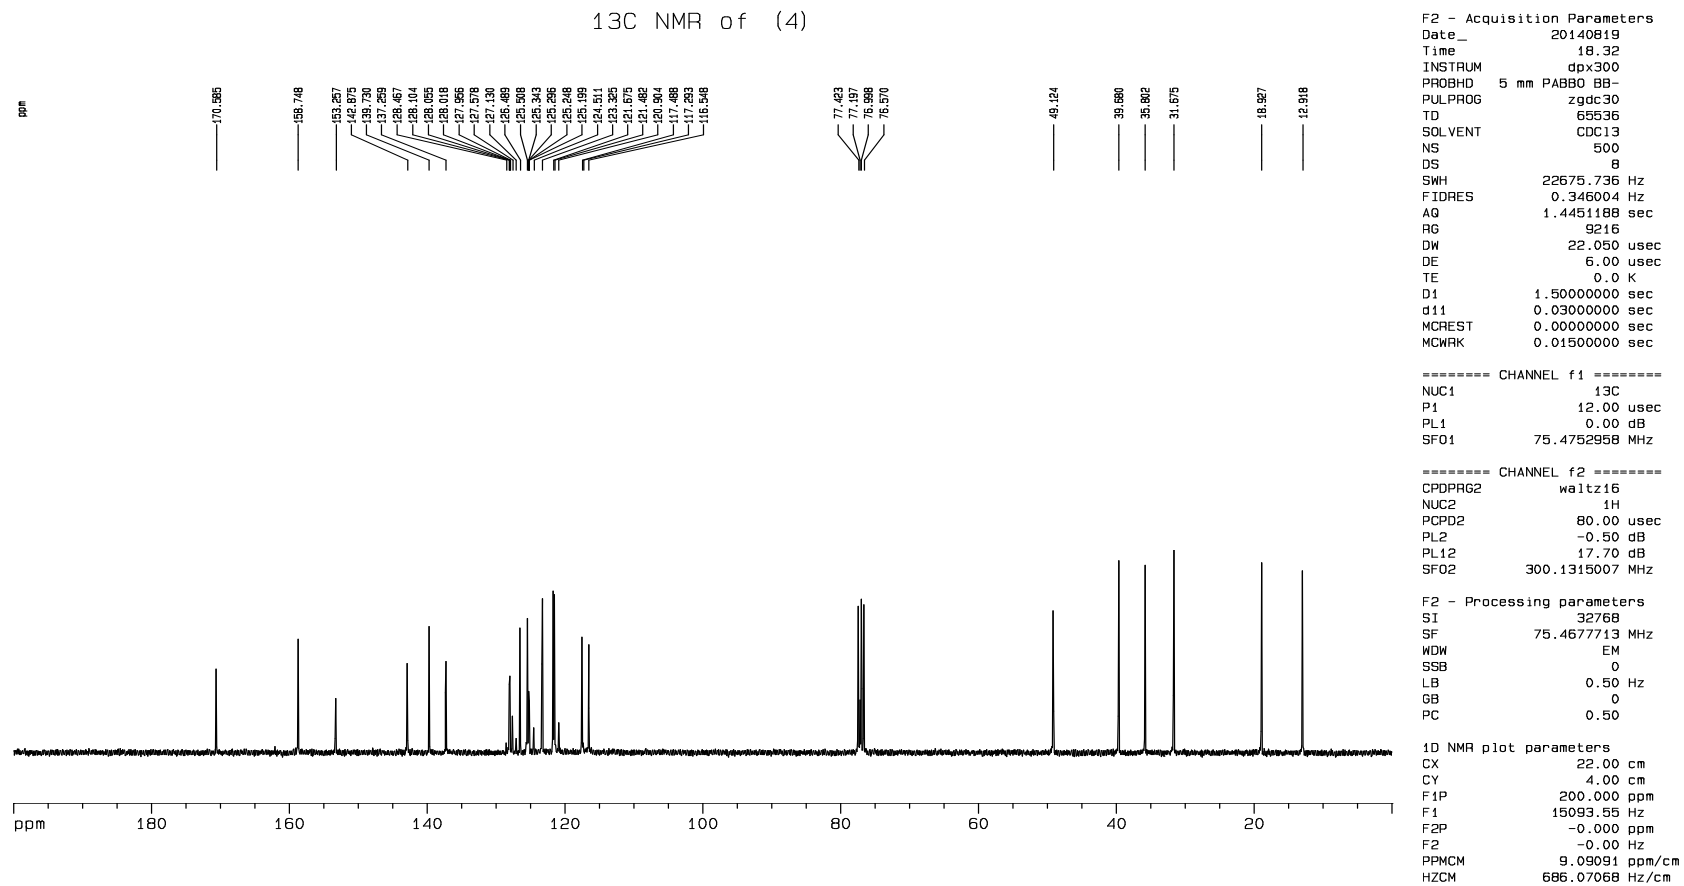

Fig. S8 <sup>13</sup>C NMR (75.47 MHz; CDCl<sub>3</sub>) of **Im-1** (1-Butyl-3-methylimidazolium 5-[2-chloro-4-(trifluoromethyl)phenoxy]-N-[methylsulfonyl]-2-nitrobenzamide)

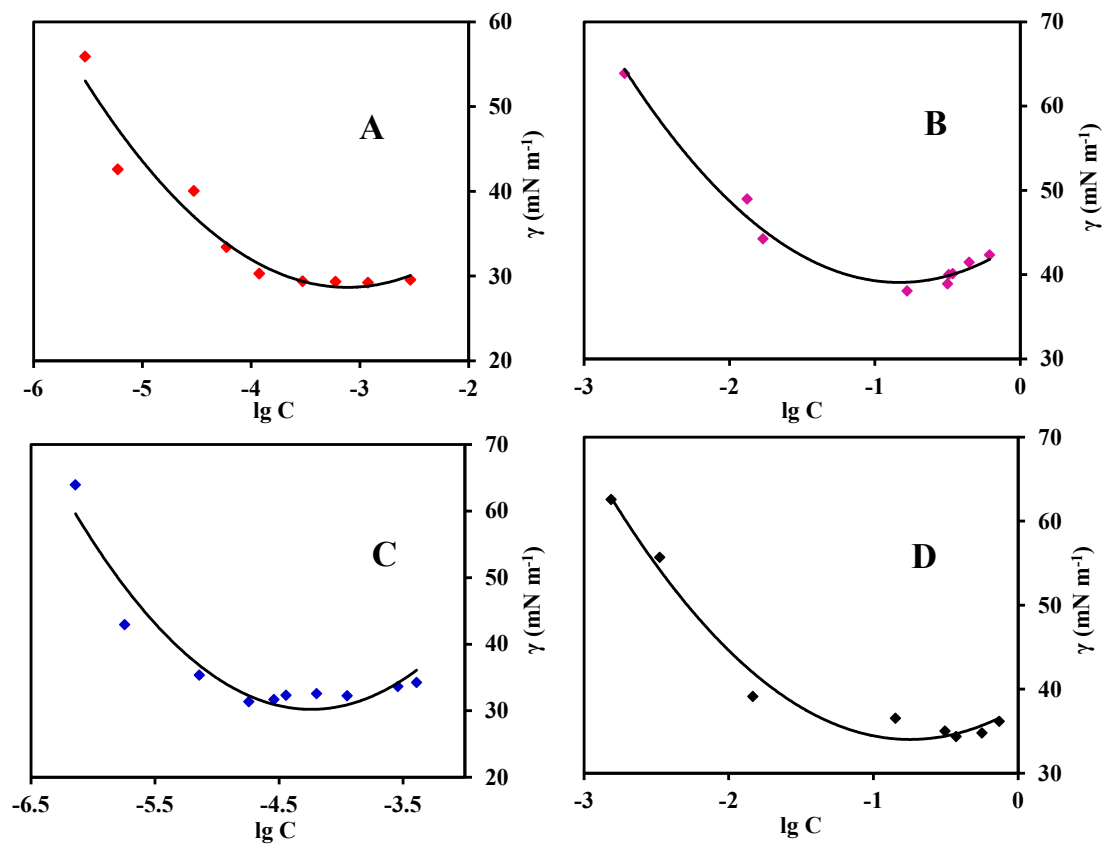

Fig. S9 The surface tension curves ( $\gamma$ -lg C curves) for N-1 (A), Ben-1 (B), Pyr-1 (C), Im-1 (D).
